# Supplementary material for: Large-Scale Preparation of Polymer Nanofibers for Air Filtration by a New Multineedle Electrospinning Device
Source: Hindawi journal article supplement (doi:10.1155/2020/4965438), 2020-04-06
Supplement: f1 [file 4965438.f1.docx]

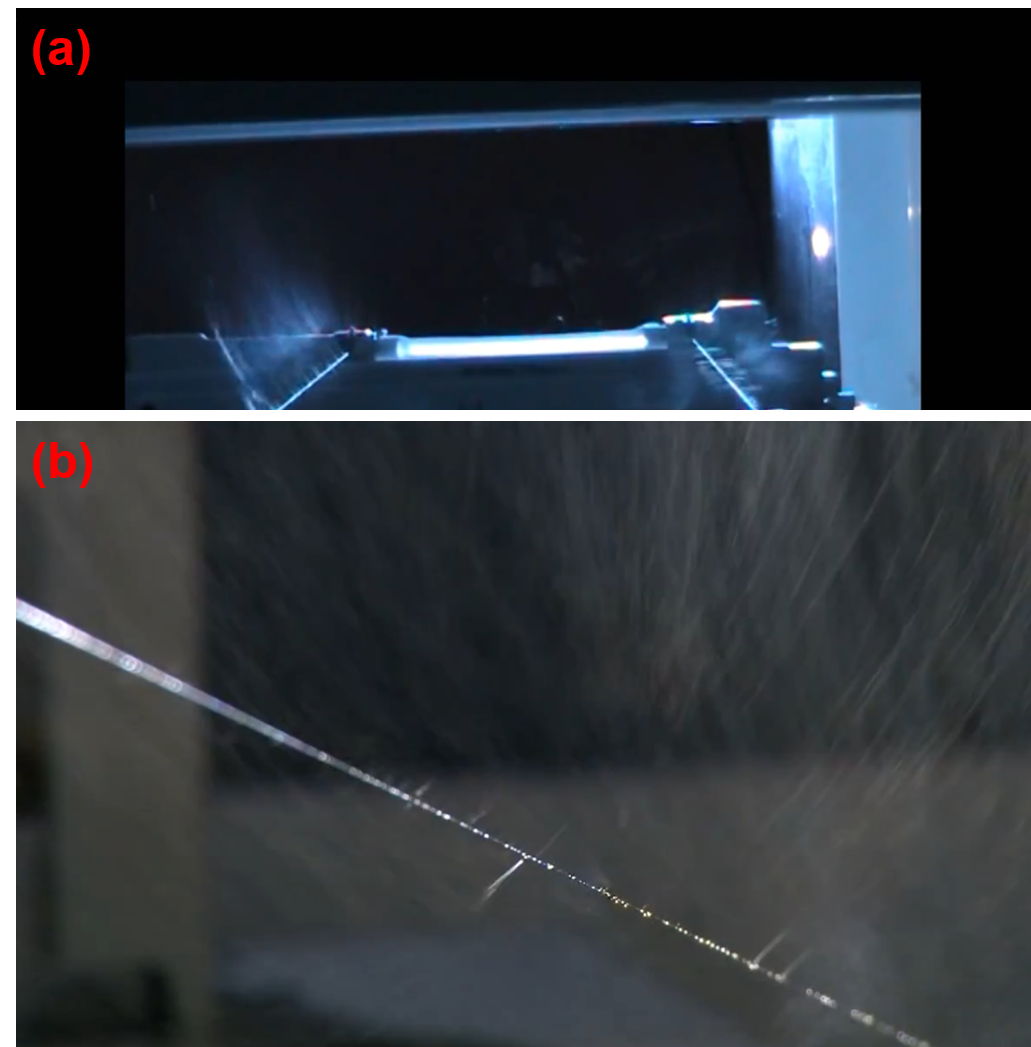


Figure S1. Picture of a new multi-needle spinning device for electrospinning process.

Table. Comparison between traditional multi-needle electrospinning and new multi-needle electrospinning.

| Manufacturing  process | Scope for  industry | Advantages | Disadvantages | References |
| --- | --- | --- | --- | --- |
| Traditional multi-needle electrospinning | Yes | High production rate. | needle clogging; Difficult to clean. | [8,9] |
| New multi-needle electrospinning | Yes | High production rate；Convenient；Avoid needle clogging problem. | No |  |
